# Supplementary material for: Synthesis of catalytically active gold clusters on the surface of Fe3O4@SiO2nanoparticles
Source: Royal Society of Chemistry journal article supplement (doi:10.1039/c6ra20055a), 2016-01-01
Supplement: c6ra20055a1.pdf [file c6ra20055a1.pdf]

Supplementary Information

# **Synthesis of Catalytically Active Gold Clusters on the Surface of Fe<sub>3</sub>O<sub>4</sub>@SiO<sub>2</sub> Nanoparticles**

Paulino Alonso-Cristobal,<sup>1</sup> M. Arturo Lopez-Quintela,<sup>2</sup> Rafael Contreras-Caceres<sup>3</sup>, Enrique Lopez-Cabarcos<sup>1</sup>, Jorge Rubio-Retama<sup>1</sup>, and Marco Laurenti<sup>\*1</sup>

<sup>1</sup>Department of Physical-Chemistry II, Faculty of Pharmacy, Universidad Complutense de Madrid, Madrid, Spain.

<sup>2</sup>Grupo Nanomag, Instituto de Investigaciones Tecnológicas, Universidade de Santiago de Compostela, Spain.

<sup>3</sup>Department of Organic Chemistry University of Malaga, Málaga, Spain.

## **Author Information**

## **Corresponding Authors**

\*Email: [mlaurent@ucm.es](mailto:mlaurent@ucm.es)

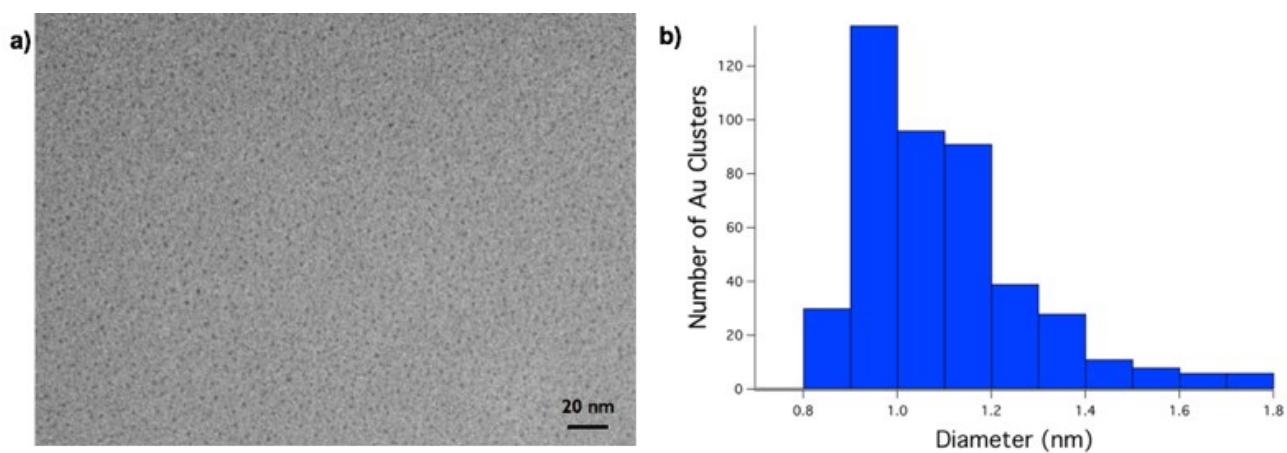

Figure S1. a) TEM image of the Au clusters obtained in water by simply mixing 25  $\mu\text{L}$  of  $\text{HAuCl}_4$  30 mM and 10 mL of TTMAPP porphyrin 0.1 mM at acidic pH. b) Size distribution of the synthesized Au clusters calculated using Image J v1.50i.

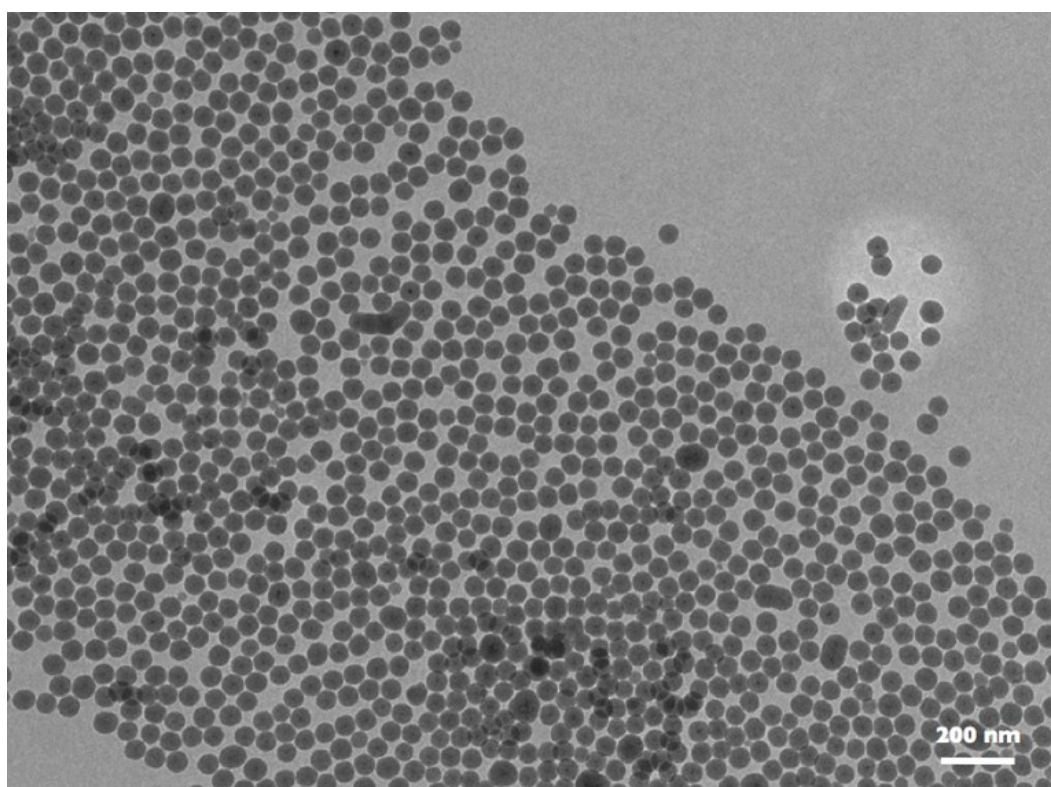

Figure S2. TEM micrograph showing  $\text{Fe}_3\text{O}_4@\text{SiO}_2$  nanoparticles obtained in high yield with a homogenous size distribution.

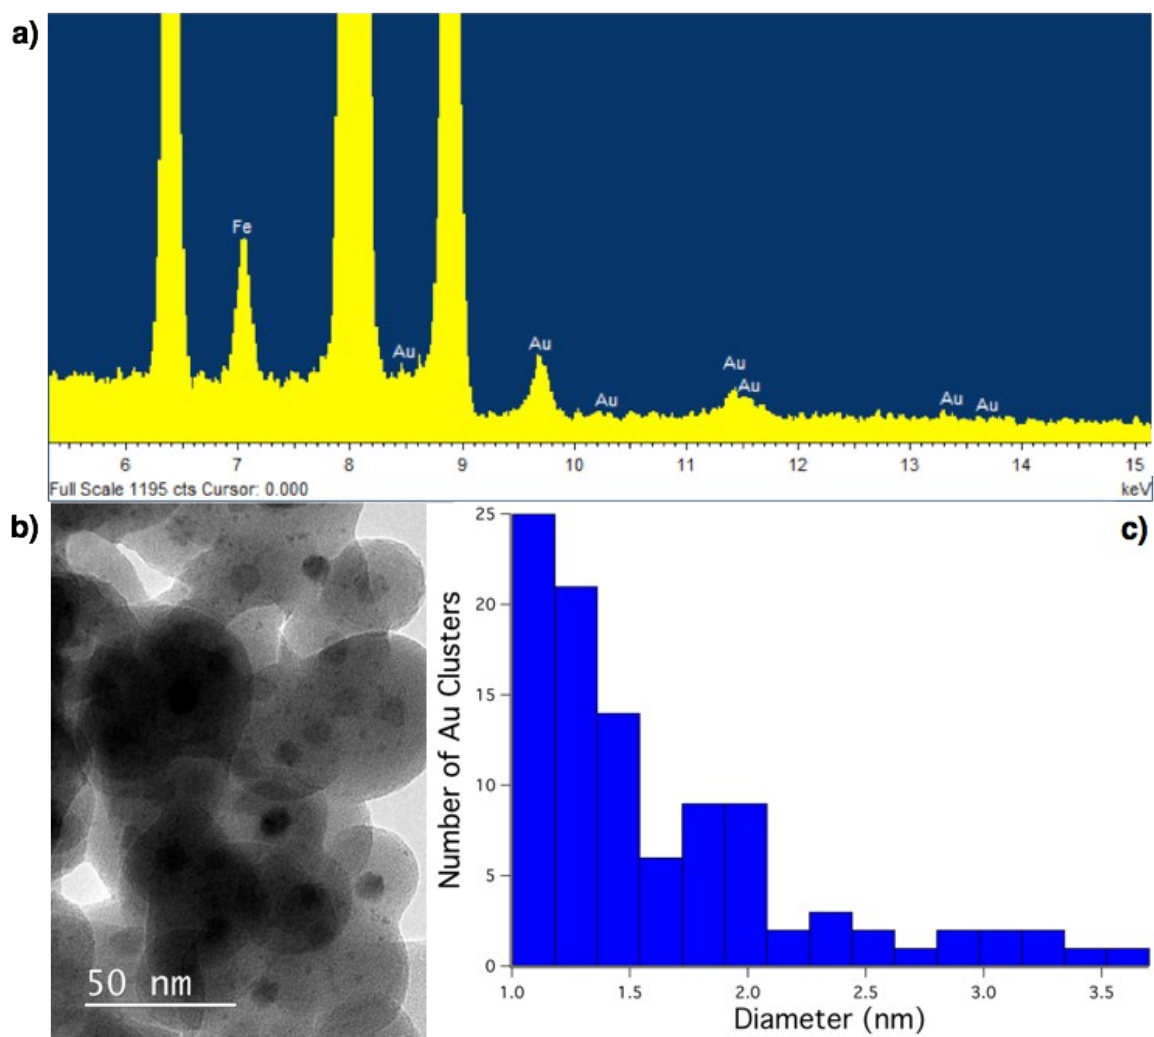

Figure S3. a) Energy Dispersive X-ray Spectroscopy (EDS) confirms the presence of Au onto the surface of the  $\text{Fe}_3\text{O}_4@\text{SiO}_2$  nanoparticles. The quantification of the elements composing the system was 8.45% of Fe, 89.29% of Si, and 2.26% of Au found on the  $\text{Fe}_3\text{O}_4@\text{SiO}_2@\text{Au}$  nanoparticles analyzed in image b). c) Representation of the size distribution of the Au clusters deposited on  $\text{SiO}_2$  nanoparticles.

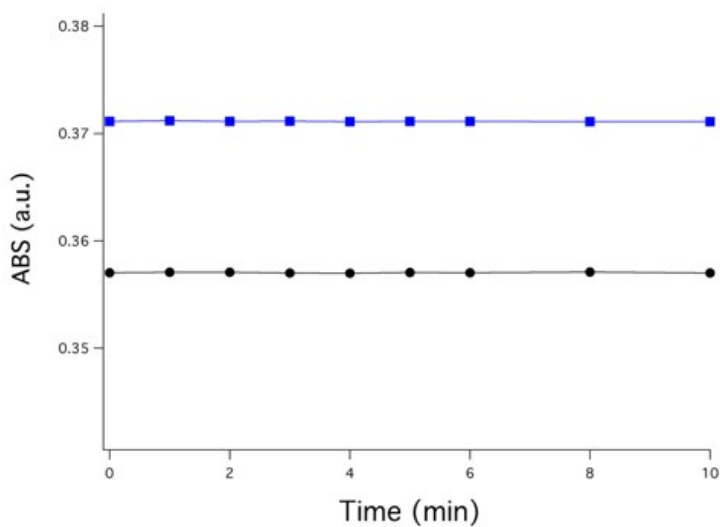

Figure S4. Control experiments were performed by measuring the absorbance at 400 nm during 10 minutes of the system composed by 200  $\mu\text{L}$  of 4-NP ( $2 \text{ mmol L}^{-1}$ ), 1.4 mL of  $\text{NaBH}_4$  ( $100 \text{ mmol L}^{-1}$ ) and 1.4 mL of  $\text{H}_2\text{O}$  represented by the blue line, and the black line represents the same system after adding 20  $\mu\text{L}$  of the  $\text{Fe}_3\text{O}_4@\text{SiO}_2$  with encapsulated TTMAPP.

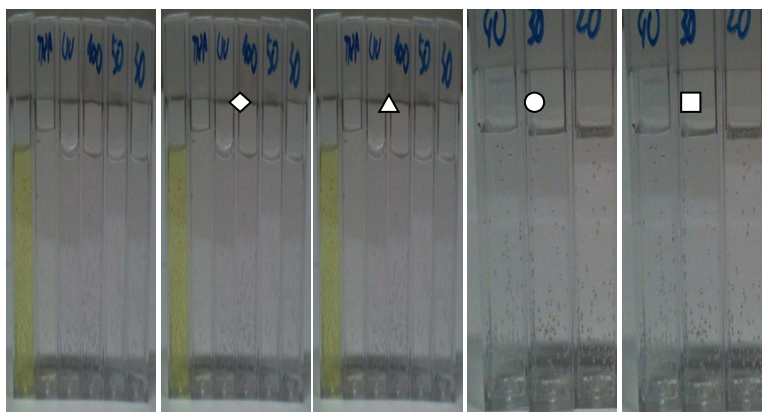

Figure S5. From left to right, cuvettes showing the resulting solutions after using different amounts of  $\text{Fe}_3\text{O}_4@\text{SiO}_2@\text{Au}$  nanoparticles: 0,  $\diamond$  0.66,  $\triangle$  1.00,  $\circ$  1.65, and  $\square$  3.30  $\mu\text{g}$ . The intense yellow color indicates the formation of the 4-nitrophenolate ions after  $\text{NaBH}_4$  addition.
